# Supplementary material for: Soybean Calmodulin-Binding Transcription Activators, GmCAMTA2 and GmCAMTA8, Coordinate the Circadian Regulation of Developmental Processes and Drought Stress Responses
Source: MDPI journal article supplement (doi:10.3390/ijms241411477), 2023-07-14
Supplement: s1 [file s1]

## Supplementary Informations

# Soybean Calmodulin-binding Transcription Activators, GmCAMTA2 and GmCAMTA8, Coordinate the Circadian Regulation of Developmental Processes and Drought Stress Responses

Dongwon Baek <sup>1,†</sup>, Hyun Min Cho <sup>2,†</sup>, Ye Jin Cha <sup>2</sup>, Byung Jun Jin <sup>3</sup>, Su Hyeon Lee <sup>2</sup>, Mi Suk Park <sup>1</sup>, Hyun Jin Chun <sup>3,\*</sup>, Min Chul Kim <sup>1,2,3,\*</sup>

<sup>1</sup> Plant Molecular Biology and Biotechnology Research Center, Gyeongsang National University, Jinju 52828, Republic of Korea; dw100@hanmail.net (D.B.); misugip@hanmail.net (M.S.P.)

<sup>2</sup> Division of Applied Life Science (BK21 Four), Gyeongsang National University, Jinju 52828, Republic of Korea; hmcho86@gnu.ac.kr (H.M.C.); cdw3280@naver.com (Y.J.C.); leesuhyeon86@gmail.com (S.H.L.)

<sup>3</sup> Institute of Agriculture and Life Science, Gyeongsang National University, Jinju 52828, Republic of Korea; scv5789@naver.com

\* Correspondence: hj\_chun@hanmail.net (H.J.C.); mckim@gnu.ac.kr (M.C.K.); Tel.: +82-55-772-1874 (H.J.C. & M.C.K.)

† These authors contributed equally to this work.

### Supplementary Materials:

**Supplementary Figure S1.** Diurnal expression of *GmCAMTAs* in the Diurnal web database.

**Supplementary Figure S2.** Transcriptional expression of *GmCAMTAs* in soybean tissues using qRT-PCR analysis.

**Supplementary Figure S3.** RT-PCR analysis in *Arabidopsis* transgenic plants overexpressing *GmCAMTA2* and *GmCAMTA8*.

**Supplementary Table S1.** List of 15 *GmCAMTA* genes in the Phytozome database.

**Supplementary Table S2.** List of primers in this study.

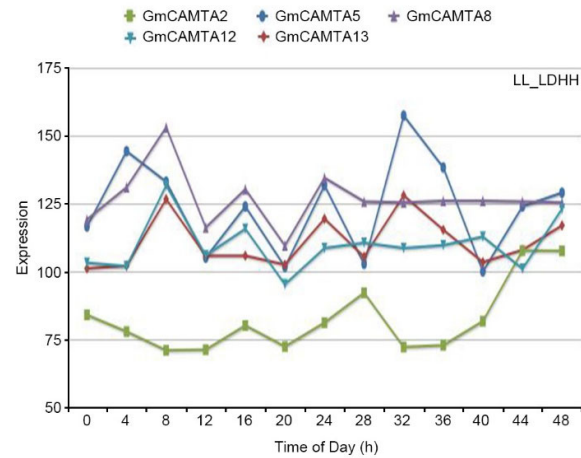

**Supplementary Figure S1.** Diurnal expression of *GmCAMTAs* in the Diurnal web database.

The diurnal expression of *GmCAMTA2*, *GmCAMTA5*, *GmCAMTA8*, *GmCAMTA12*, and *GmCAMTA13* under LL\_LDHH condition using the Diurnal database tool (<http://diurnal.mocklerlab.org/>). The diurnal expression data of other *GmCAMTAs* were not available in the Diurnal web database. The “LL\_LDHH” means a constant light for 24 h (LL), light 12h/dark 12h conditions (LD), and a constant hot temperature (31 °C; HH).

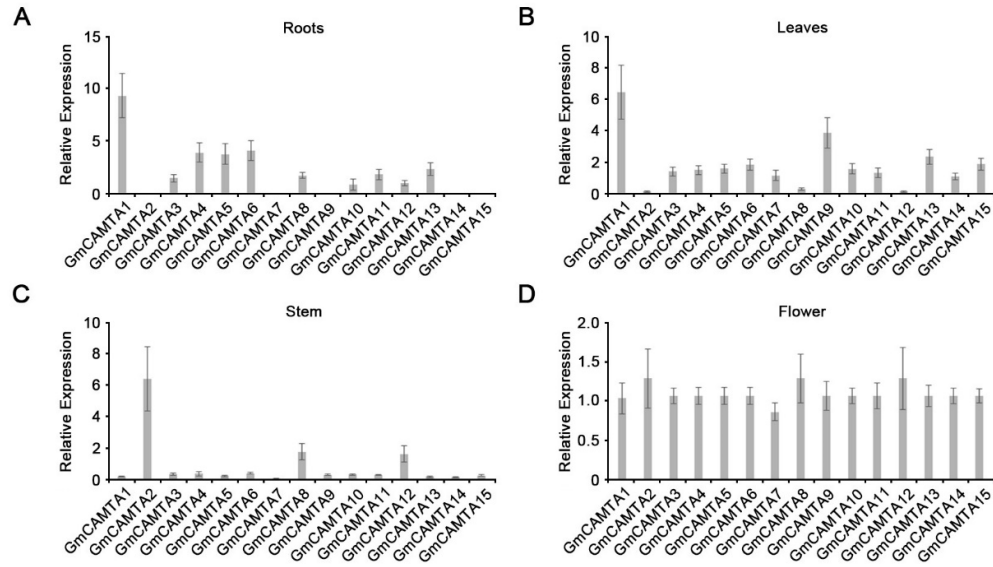

**Supplementary Figure S2.** Transcriptional expression of GmCAMTAs in soybean tissues using qRT-PCR analysis. The expression levels of *GmCAMTAs* were analyzed in different tissues of soybean plants using qRT-PCR. The total RNA was extracted from various tissues, including (A) roots, (B) leaves, (C) stem, and (D) flower, at the V4 stages of WT soybeans grown under long-day conditions (16h light / 8h dark). qRT-PCR analysis was performed with each *GmCAMTA*-specific primer (Supplementary Table S2). *GmTUBULIN* was used as an internal control for normalization. Error bars represent the SD of three biological replicates, each with three technical replicates.

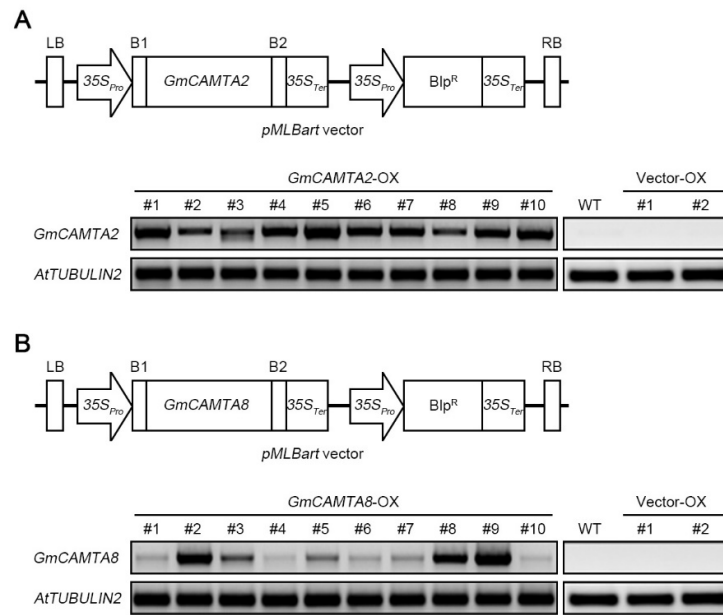

**Supplementary Figure S3.** RT-PCR analysis in *Arabidopsis* transgenic plants overexpressing *GmCAMTA2* and *GmCAMTA8*. Upper panels in (A) and (B); Schematic representation of the *pMLBart* binary vectors used for generating *Arabidopsis* transgenic plants overexpressing *GmCAMTA2* (A) and *GmCAMTA8* (B). Bottom panels in (A) and (B); Analysis of RT-PCR. Total RNAs isolated from each 10-day-old seedling of *Arabidopsis* T1 transgenic plants overexpressing *GmCAMTA2* (A) and *GmCAMTA8* (B). The analysis of RT-PCR was performed with each *GmCAMTA*s-specific primer (Supplementary Table S2). The *AtTUBULIN2* in *Arabidopsis* was used as an internal control.

**Supplementary Table S1.** List of 15 *GmCAMTA* genes in the Phytozome database.

| Gene Name        | Locus No.              | Chromosome No. | Genome Length (bp) | Transcript Length (bp) | CDS Length (bp) | Protein Length (aa) |
|------------------|------------------------|----------------|--------------------|------------------------|-----------------|---------------------|
| <i>GmCAMTA1</i>  | <i>Glyma.05G178200</i> | 5              | 8,069              | 3,889                  | 3,369           | 1,123               |
| <i>GmCAMTA2</i>  | <i>Glyma.08G135200</i> | 8              | 8,007              | 3,872                  | 3,309           | 1,103               |
| <i>GmCAMTA3</i>  | <i>Glyma.15G053600</i> | 15             | 11,253             | 3,830                  | 3,267           | 1,089               |
| <i>GmCAMTA4</i>  | <i>Glyma.08G072100</i> | 8              | 11,294             | 3,813                  | 3,240           | 1,080               |
| <i>GmCAMTA5</i>  | <i>Glyma.05G117000</i> | 5              | 10,456             | 3,791                  | 3,267           | 1,089               |
| <i>GmCAMTA6</i>  | <i>Glyma.08G178900</i> | 8              | 11,604             | 3,947                  | 3,246           | 1,082               |
| <i>GmCAMTA7</i>  | <i>Glyma.17G038800</i> | 17             | 8,414              | 3,665                  | 3,000           | 1,000               |
| <i>GmCAMTA8</i>  | <i>Glyma.15G143400</i> | 15             | 9,976              | 3,274                  | 2,736           | 912                 |
| <i>GmCAMTA9</i>  | <i>Glyma.09G038300</i> | 9              | 10,333             | 3,378                  | 2,736           | 912                 |
| <i>GmCAMTA10</i> | <i>Glyma.05G148300</i> | 5              | 10,592             | 3,637                  | 2,952           | 984                 |
| <i>GmCAMTA11</i> | <i>Glyma.18G005100</i> | 18             | 9,037              | 3,570                  | 2,889           | 963                 |
| <i>GmCAMTA12</i> | <i>Glyma.17G031900</i> | 17             | 8,109              | 3,606                  | 2,769           | 923                 |
| <i>GmCAMTA13</i> | <i>Glyma.07G242000</i> | 7              | 8,858              | 3,425                  | 2,766           | 922                 |
| <i>GmCAMTA14</i> | <i>Glyma.11G251900</i> | 11             | 8,300              | 3,196                  | 2,733           | 911                 |
| <i>GmCAMTA15</i> | <i>Glyma.08G105200</i> | 8              | 8,020              | 3,220                  | 2,898           | 966                 |

**Supplementary Table S2.** List of primers in this study.

| Gene                                          | Primer  | Direction | Sequence (5'→3')      | Purpose                             |
|-----------------------------------------------|---------|-----------|-----------------------|-------------------------------------|
| <i>GmCAMTA1</i><br>( <i>Glyma.05G178200</i> ) | MG-2943 | Forward   | GAAAAGGTAGTGGTTTGCGTG | Analysis of<br>qRT-PCR<br>or RT-PCR |
|                                               | MG-2944 | Reverse   | CTTTGCTCTGTTTGCTTCCTG |                                     |
| <i>GmCAMTA2</i><br>( <i>Glyma.08G135200</i> ) | MG-2931 | Forward   | AAGGCTGGAAGTGTTGATG   |                                     |
|                                               | MG-2932 | Reverse   | TTGGTTCCCTTCACTTGTCG  |                                     |
| <i>GmCAMTA3</i><br>( <i>Glyma.15G053600</i> ) | MG-2957 | Forward   | AGGGACGGAACAAAAGGAAG  |                                     |
|                                               | MG-2958 | Reverse   | ACCCTTGTTAGATGCCTTGG  |                                     |
| <i>GmCAMTA4</i><br>( <i>Glyma.08G072100</i> ) | MG-2947 | Forward   | GTTCAGTATCCAGAGGCACG  |                                     |
|                                               | MG-2948 | Reverse   | TCCCTTGGTTTGACGGAAG   |                                     |

|                                                |         |         |                             |                 |
|------------------------------------------------|---------|---------|-----------------------------|-----------------|
| <i>GmCAMTA5</i><br>( <i>Glyma.05G117000</i> )  | MG-2963 | Forward | GTTTCAGTATCCAGAGGCACG       |                 |
|                                                | MG-2964 | Reverse | CACCATCAACTGTCTCTTCCG       |                 |
| <i>GmCAMTA6</i><br>( <i>Glyma.08G178900</i> )  | MG-2951 | Forward | AGGGACGGAACAAAAGGAAG        |                 |
|                                                | MG-2952 | Reverse | AACCTCGTTAGATGCCTTG         |                 |
| <i>GmCAMTA7</i><br>( <i>Glyma.17G038800</i> )  | MG-2959 | Forward | CAGATCCACCTGTTATGCCTC       |                 |
|                                                | MG-2960 | Reverse | GCTTCTCTTACAGTCTTCCCATC     |                 |
| <i>GmCAMTA8</i><br>( <i>Glyma.15G143400</i> )  | MG-2933 | Forward | CTGCGTTGGCGTTAAAGAG         |                 |
|                                                | MG-2934 | Reverse | AATCACTTTCCTGCGTCTCC        |                 |
| <i>GmCAMTA9</i><br>( <i>Glyma.09G038300</i> )  | MG-2953 | Forward | GTAGTCCTTTATCTTCGGGTGG      |                 |
|                                                | MG-2954 | Reverse | GTTTCATCCATGTTCCAAAGCTG     |                 |
| <i>GmCAMTA10</i><br>( <i>Glyma.05G148300</i> ) | MG-2941 | Forward | TGACATCAATGGGTGGACTG        |                 |
|                                                | MG-2942 | Reverse | GGTTGGATCTTGTGCATTGG        |                 |
| <i>GmCAMTA11</i><br>( <i>Glyma.18G005100</i> ) | MG-2961 | Forward | TGGGCAGTTGGAATCTTGG         |                 |
|                                                | MG-2962 | Reverse | CGGAACACGCTGAGAAAATC        |                 |
| <i>GmCAMTA12</i><br>( <i>Glyma.17G031900</i> ) | MG-2935 | Forward | CTCGCATACAGTGTACATACCG      |                 |
|                                                | MG-2936 | Reverse | ACGACACCAACAGACCAAAG        |                 |
| <i>GmCAMTA13</i><br>( <i>Glyma.07G242000</i> ) | MG-2945 | Forward | TCTTTGGTCTGTTGGTGTGG        |                 |
|                                                | MG-2946 | Reverse | ATCGACAGTTTGACCTGGAG        |                 |
| <i>GmCAMTA14</i><br>( <i>Glyma.11G251900</i> ) | MG-2955 | Forward | ATTCTCTGCCATGACTCGG         |                 |
|                                                | MG-2956 | Reverse | ATGCCGTCCTGAATTATCTCTG      |                 |
| <i>GmCAMTA15</i><br>( <i>Glyma.08G105200</i> ) | MG-2949 | Forward | GTCTTTTCTCTGTCATCCCTCG      |                 |
|                                                | MG-2950 | Reverse | TGCACAGAGTAACCTTTCCAG       |                 |
| <i>GmTUBULIN</i><br>( <i>Glyma.17G258300</i> ) | MG-2937 | Forward | TGGCCGTTACCTGACAGCAT        |                 |
|                                                | MG-2938 | Reverse | CTCGGAGGGATGTCACACAC        |                 |
| <i>AtRD29A</i><br>( <i>AT5G52310</i> )         | MG-2000 | Forward | CCTGAAGTGATCGATGCACCAG      |                 |
|                                                | MG-2001 | Reverse | TGGTGTAATCGGAAGACACGAC      |                 |
| <i>AtRD29B</i><br>( <i>AT5G52300</i> )         | MG-2002 | Forward | GTGAAGATGACTATCTCGGTGG      |                 |
|                                                | MG-2003 | Reverse | CACCACTGAGATAATCCGATCC      |                 |
| <i>AtP5CS2</i><br>( <i>AT3G55610</i> )         | MG-2018 | Forward | AGCAGCCTGTAATGCGATGG        |                 |
|                                                | MG-2019 | Reverse | AAGTGACGCCTTTGGTTTGC        |                 |
| <i>AtKIN1</i><br>( <i>AT5G15960</i> )          | MG-2016 | Forward | CCAACAAGAATGCCTTCCAAGC      |                 |
|                                                | MG-2017 | Reverse | GCTGCCGCATCCGATACACT        |                 |
| <i>AtTUBULIN2</i><br>( <i>AT5G62690</i> )      | MG4028  | Forward | TGGCATCAACTTTCATTGGA        |                 |
|                                                | MG-4029 | Reverse | ATGTTGCTCTCCGCTTCTGT        |                 |
| <i>GmCAMTA2</i><br>( <i>Glyma.08G135200</i> )  | MG-1523 | Forward | CCATGGCTGAGGCCAGACTCTAC     | Gene<br>cloning |
|                                                | MG-1281 | Reverse | CTCAGCTGTGAAATTCTAAATCACCCC |                 |
| <i>GmCAMTA8</i><br>( <i>Glyma.15G143400</i> )  | MG-1530 | Forward | CATCCCAAATATGGGGAAACCTTGTTT |                 |
|                                                | MG-1531 | Reverse | CATCCCAAATATGGGGAAACCTTGTTT |                 |
